# Supplementary material for: Evaluating the Mechanism by Which the TNO Stereo Test Overestimates Stereo Thresholds
Source: Hindawi journal article supplement (doi:10.1155/2021/6665638), 2021-01-18
Supplement: f1 [file 6665638.f1.pdf]

399 **Supplementary table**

400

**Test results of participants**

401

| ID | age | Original | isoluminance | Grayscale | Black-white |
|----|-----|----------|--------------|-----------|-------------|
| 1  | 28  | 10       | 10           | 10        | 10          |
| 2  | 24  | 20       | 20           | 20        | 20          |
| 3  | 24  | 10       | 10           | 10        | 10          |
| 4  | 28  | 30       | 30           | 20        | 20          |
| 5  | 24  | 20       | 20           | 20        | 10          |
| 6  | 25  | 40       | 40           | 30        | 20          |
| 7  | 27  | 40       | 40           | 40        | 30          |
| 8  | 27  | 20       | 20           | 30        | 20          |
| 9  | 25  | 30       | 30           | 20        | 20          |
| 10 | 24  | 20       | 20           | 20        | 20          |
| 11 | 24  | 40       | 40           | 30        | 30          |
| 12 | 24  | 30       | 30           | 20        | 20          |
| 13 | 25  | 20       | 20           | 20        | 20          |
| 14 | 25  | 60       | 60           | 40        | 40          |
| 15 | 25  | 20       | 20           | 20        | 10          |
| 16 | 25  | 20       | 20           | 20        | 10          |
| 17 | 22  | 30       | 30           | 30        | 20          |
| 18 | 22  | 30       | 30           | 30        | 20          |
| 19 | 22  | 40       | 30           | 30        | 20          |
| 20 | 22  | 50       | 40           | 20        | 20          |
| 21 | 22  | 50       | 50           | 30        | 20          |
| 22 | 22  | 30       | 20           | 20        | 20          |
| 23 | 22  | 40       | 40           | 30        | 20          |
| 24 | 22  | 30       | 20           | 20        | 20          |
| 25 | 22  | 50       | 40           | 40        | 10          |
| 26 | 22  | 50       | 40           | 50        | 20          |
| 27 | 27  | 30       | 30           | 30        | 20          |
| 28 | 25  | 50       | 40           | 40        | 20          |
| 29 | 24  | 30       | 30           | 20        | 10          |
| 30 | 20  | 50       | 40           | 40        | 30          |
| 31 | 20  | 30       | 30           | 40        | 30          |
| 32 | 25  | 10       | 10           | 10        | 10          |
